# Supplementary material for: Synthesis and anti-infective potency study of a Ru-based complex bearing benzonitrile against Staphylococcus aureus
Source: Royal Society of Chemistry journal article supplement (doi:10.1039/d3nj04704k), 2023-01-01
Supplement: d3nj04704k1.pdf [file d3nj04704k1.pdf]

## Supplementary Materials

### Synthesis and Anti-infective Potency Study of Ru-based Complex bearing Benzonitrile against *Staphylococcus aureus*

Ziying Huang<sup>[a]§</sup>, Guijuan Jiang<sup>[a]§</sup>, Yun Song<sup>[a]§</sup>, Jingjing Chen<sup>[a]§</sup>, Wenjing Lin<sup>[a]</sup>, Guangying Yu<sup>[a]</sup>, Xuemin Duan<sup>[a]</sup>, Yanshi Xiong<sup>[a]</sup>, Jintao Wang<sup>[a]\*</sup>, Xiangwen Liao<sup>[a]\*</sup>, Lianghong Liu<sup>[b]\*</sup>

---

[a] Jiangxi Provincial Key Laboratory of Drug Design and Evaluation, School of Pharmacy, Jiangxi Science & Technology Normal University, Nanchang, 330013, China

E-mail: jintaochem@163.com or liao492008522@163.com

[b] School of Pharmaceutical Sciences, Hunan University of Medicine, Huaihua, 418000, China

E-mail: llhfe@qq.com

§ Z. Y. Huang, G. J. Jiang, Y. Song and J. J. Chen contributed equally to this work

### Contents

|                                                                     |   |
|---------------------------------------------------------------------|---|
| 1) <b>Fig.S1.</b> <sup>1</sup> H NMR spectrum of <b>RuBZ</b> .....  | 1 |
| 2) <b>Fig.S2.</b> <sup>13</sup> C NMR spectrum of <b>RuBZ</b> ..... | 1 |
| 3) <b>Fig.S3.</b> The stability of <b>RuBZ</b> .....                | 2 |

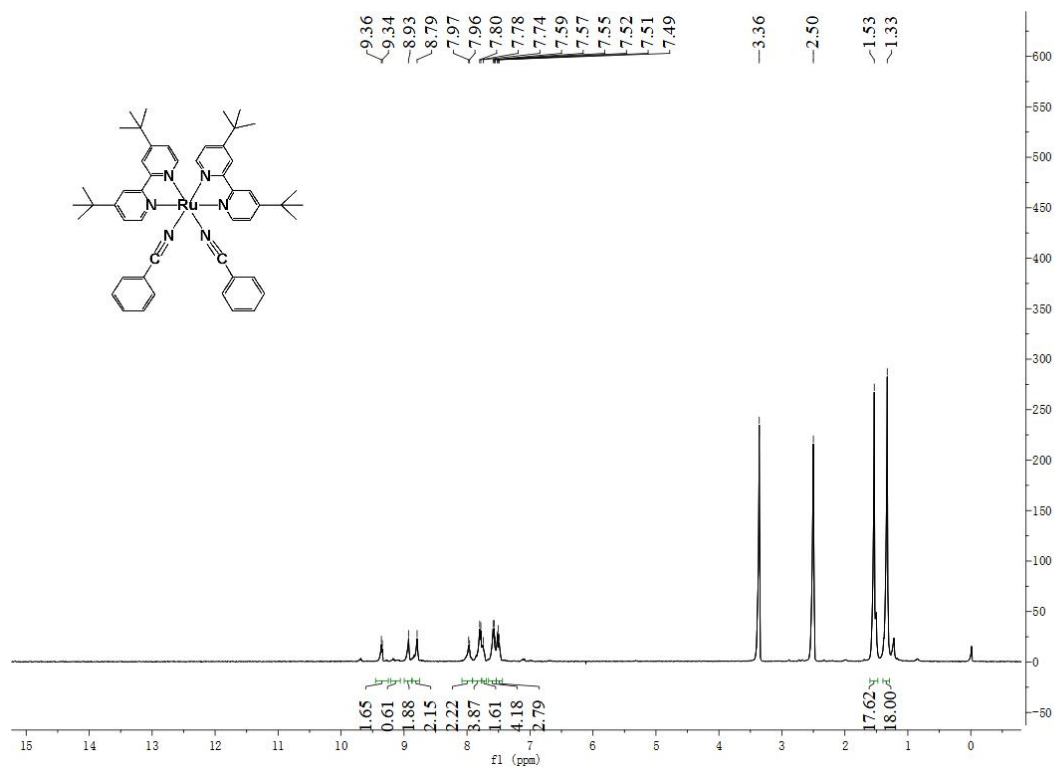

Figure S1. <sup>1</sup>H-NMR spectrum of the RuBZ.

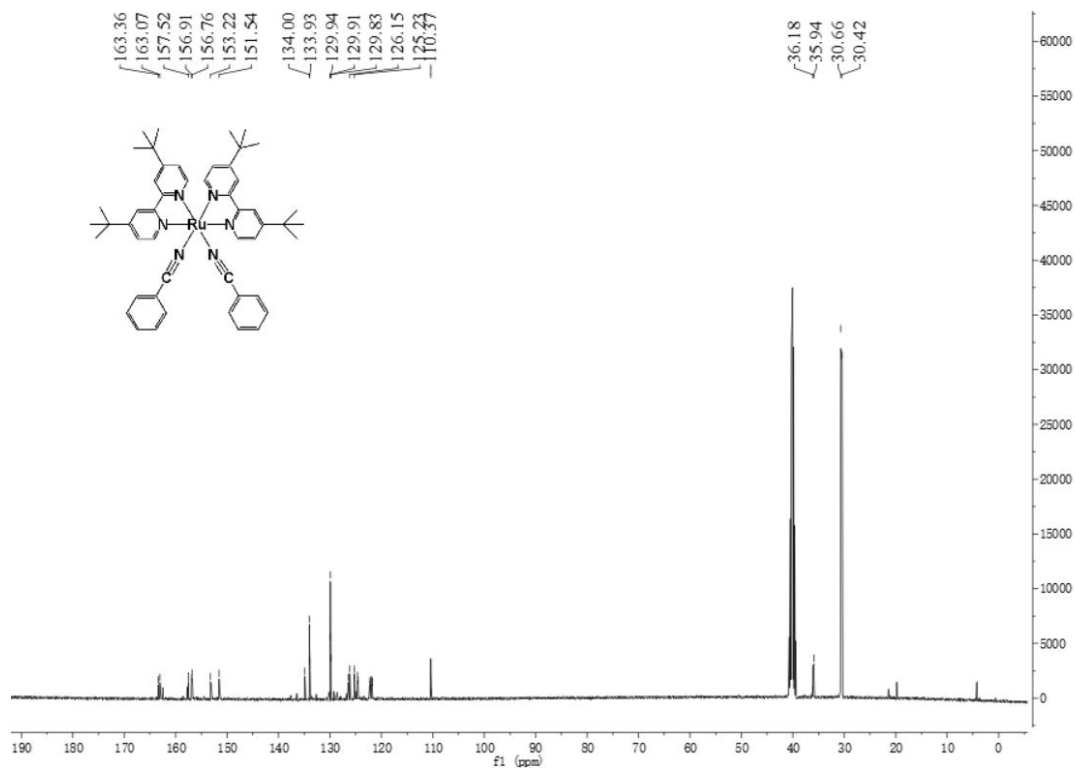

Figure S2. <sup>13</sup>C-NMR spectrum of the RuBZ.

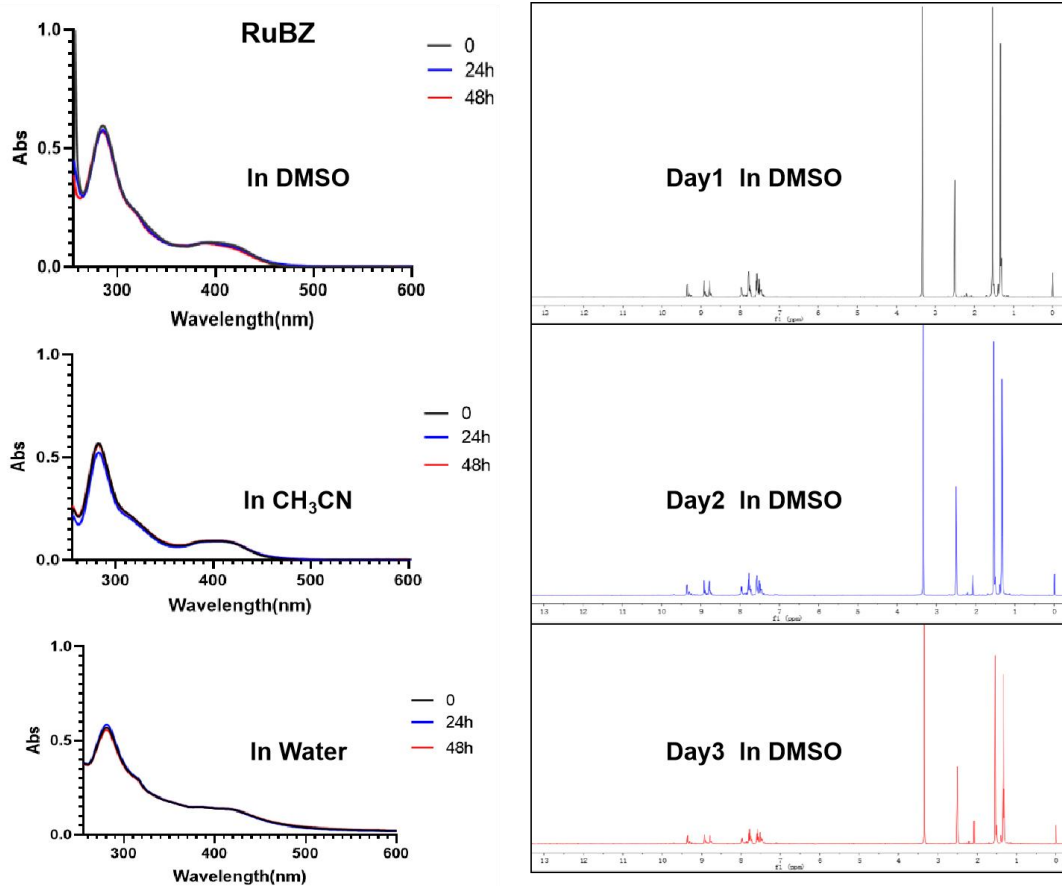

**Figure S3.** The stability of RuBZ in different solvent.
